# Supplementary material for: Anti-Transglutaminase 6 Antibodies in Children and Young Adults with Cerebral Palsy
Source: Hindawi journal article supplement (doi:10.1155/2014/237107), 2014-01-01

**Supplementary Figure: Comparison of different ELISA methods for assessment of TG6 antibodies in serum.** The in-house assay was performed as outlined in Materials and Methods and involved subtraction of the absorbance of a blank surface (no antigen) from that of a TG6-coated surface for calculation of relative antibody titres. The Zedira ELISA (IgA: 0312GE00; IgG 0412GE00) was carried out according to the manufacturer's instructions and is based on absorbance measurement on antigen-coated surface only. The data for each assay is the mean of two or more determinations. The dotted line indicates the threshold for a positive test.



**B**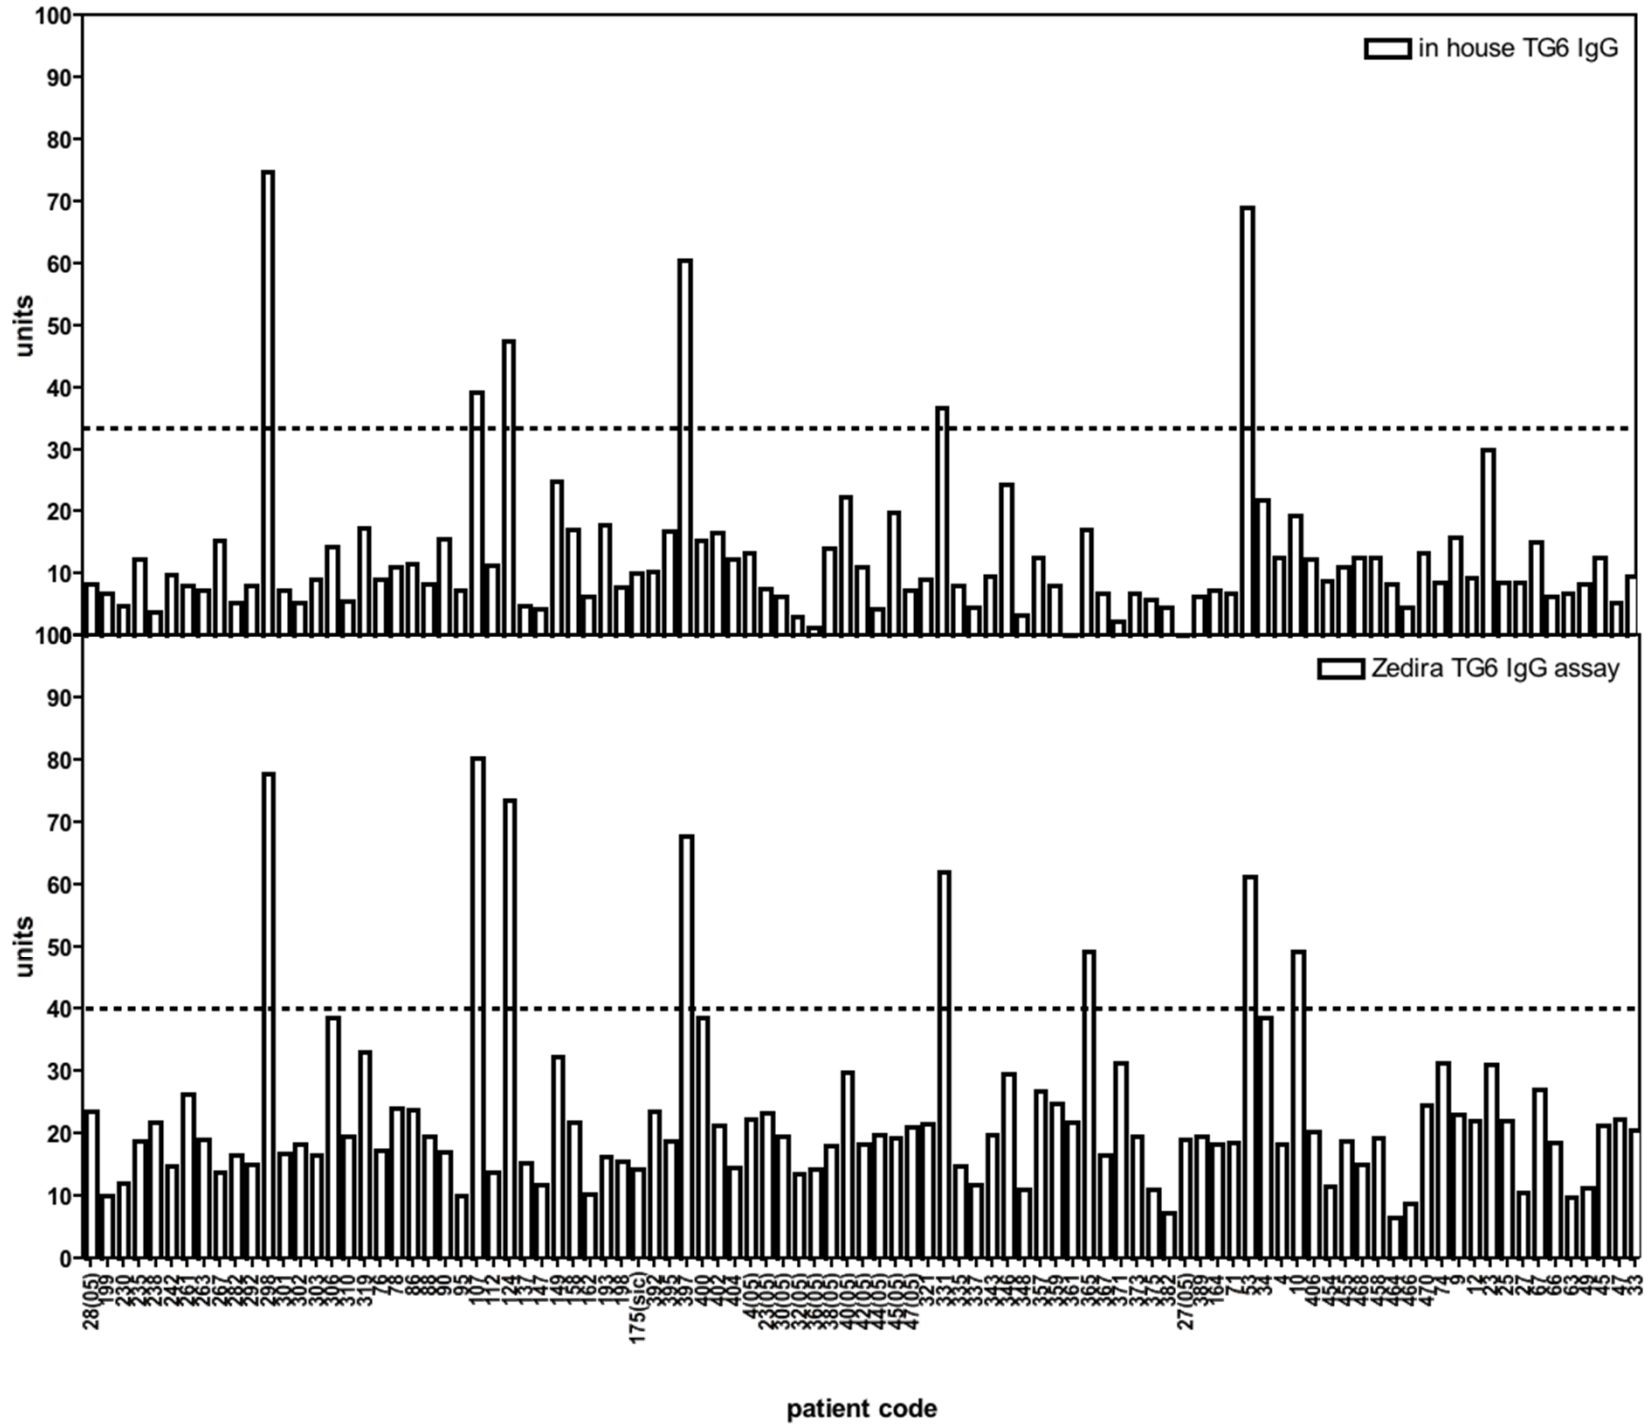

Supplement: f1 [file 237107.f1.pdf]
